# Supplementary material for: Programmable Base Editing of the Sheep Genome Revealed No Genome-Wide Off-Target Mutations
Source: PubMed Central journal article supplement (PMC6428697; doi:10.3389/fgene.2019.00215), 2019-03-15
Supplement: Table_1.pdf [file Table_1.pdf]

**Table S1** sgRNA of target sites.

| sgRNA       | Targeting site          | Location                 | Strand |
|-------------|-------------------------|--------------------------|--------|
| SOCS2 sgRNA | CTTCGCATCGAATACCAAGATGG | Chr3:129557939-129557961 | +      |

**Table S2** Oligonucleotides for generating sgRNA expression vectors.

| Name                      | Sequence                  |
|---------------------------|---------------------------|
| SOCS2 sgRNA top strand    | ACCGCTTCGCATCGAATACCAAGA  |
| SOCS2 sgRNA bottom strand | AAACTCTTGGTATTTCGATGCGAAG |

**Table S3** Primers for genotyping and amplifying BE3/sgRNA targeted region.

| Name    | Sequence              | Amplicon (bp) |
|---------|-----------------------|---------------|
| SOCS2_F | TTCAGAAAATTAACGGACCC  | 437           |
| SOCS2_R | TAGTAGTCGATCAGATGAACC |               |

**Table S4** Primers for genotyping and amplifying predicted off-target site fragments.

| Off-target site | Sequence              | Amplicon (bp) |
|-----------------|-----------------------|---------------|
| SOCS2 -OT1F     | AATATTTTTGCGTGTGGACAG | 242 bp        |
| SOCS2 -OT1R     | CAATTCCTCACACTACAGTT  |               |
| SOCS2 -OT2F     | GATTTAGCTTGTGTTTCTTCC | 289 bp        |
| SOCS2 -OT2R     | GAGAATGTCAAAGCCCTTAAC |               |
| SOCS2 -OT3F     | GTTTTCTTTGGTTAGGTCTGC | 372 bp        |
| SOCS2 -OT3R     | CTGATTGGTTAGTTCCTGTGC |               |
| SOCS2 -OT4F     | CCCTACTGTGACTGCTTTCCA | 347 bp        |
| SOCS2 -OT4R     | ATGTTCTTAGCCACTACTGAT |               |
| SOCS2 -OT5F     | TCACACTGATGAGGAAAGGTC | 280 bp        |
| SOCS2 -OT5R     | ACCTTTGCAACTTTCATCACA |               |

**Table S5** List of predicted off-target sites.

| Position | 20 | 19 | 18 | 17 | 16 | 15 | 14 | 13 | 12 | 11 | 10 | 9 | 8 | 7 | 6 | 5 | 4 | 3 | 2 | 1 | N | G | G | Location |            |            |        |
|----------|----|----|----|----|----|----|----|----|----|----|----|---|---|---|---|---|---|---|---|---|---|---|---|----------|------------|------------|--------|
| sgRNA    | C  | T  | T  | C  | G  | C  | A  | T  | C  | G  | A  | A | T | A | C | C | A | A | G | A | T | G | G | Chr.     | Start      | End        | Strand |
| OT1      | C  | T  | T  | G  | G  | C  | A  | T  | C  | G  | A  | A | T | T | C | C | A | A | G | A | A | G | G | 17       | 18,979,452 | 18,979,474 | -      |
| OT2      | C  | T  | T  | C  | T  | C  | T  | T  | C  | G  | A  | A | T | G | C | C | A | A | G | A | C | A | G | 11       | 47,007,787 | 47,007,809 | +      |
| OT3      | C  | T  | T  | A  | G  | C  | A  | T  | C  | G  | A  | A | T | A | C | A | A | A | G | G | A | A | G | 15       | 78,397,001 | 78,397,023 | +      |
| OT4      | C  | T  | T  | A  | G  | C  | A  | T  | G  | G  | C  | A | T | A | C | C | A | A | G | A | T | G | G | 5        | 79,633,962 | 79,633,984 | -      |
| OT5      | T  | T  | T  | G  | G  | C  | A  | T  | C  | G  | A  | A | A | A | C | C | A | A | G | A | G | A | G | 6        | 22,710,538 | 22,710,560 | -      |
